# Supplementary material
Source: MDPI journal article supplement (https://www.mdpi.com/2076-3263/7/3/78)
Supplement: s1 [file s1]

## Sheet: Folha1
Table S1 - Reference doses and Slope Factors for different elements from different pathwaiys
	Oral Ref Dose	Slope Factors
Co	0.0003
Cr	0.003
Ni	0.02
Cu	0.04
V	0.00504
As	0.0003	0.0015
Zn	0.3
Cd	0.001
	Derm Ref Dose
Co	0.0003
Cr	0.003
Ni	0.02
Cu	0.04
V	0.00504
As	0.0003	0.0015
Zn	0.3
Cd	2.5e-05
	Inh Ref Dose
Co	6e-06
Cr	0.0001	41
Ni	9e-05	0.84
Cu	-
V	0.0001
As	1.5e-05	50
Zn	-
Cd	1e-05	6.1
